# Supplementary figures and images for: Sow Contact Is a Major Driver in the Development of the Nasal Microbiota of Piglets
Source: MDPI journal article supplement (doi:10.3390/pathogens10060697), 2021-06-03

A

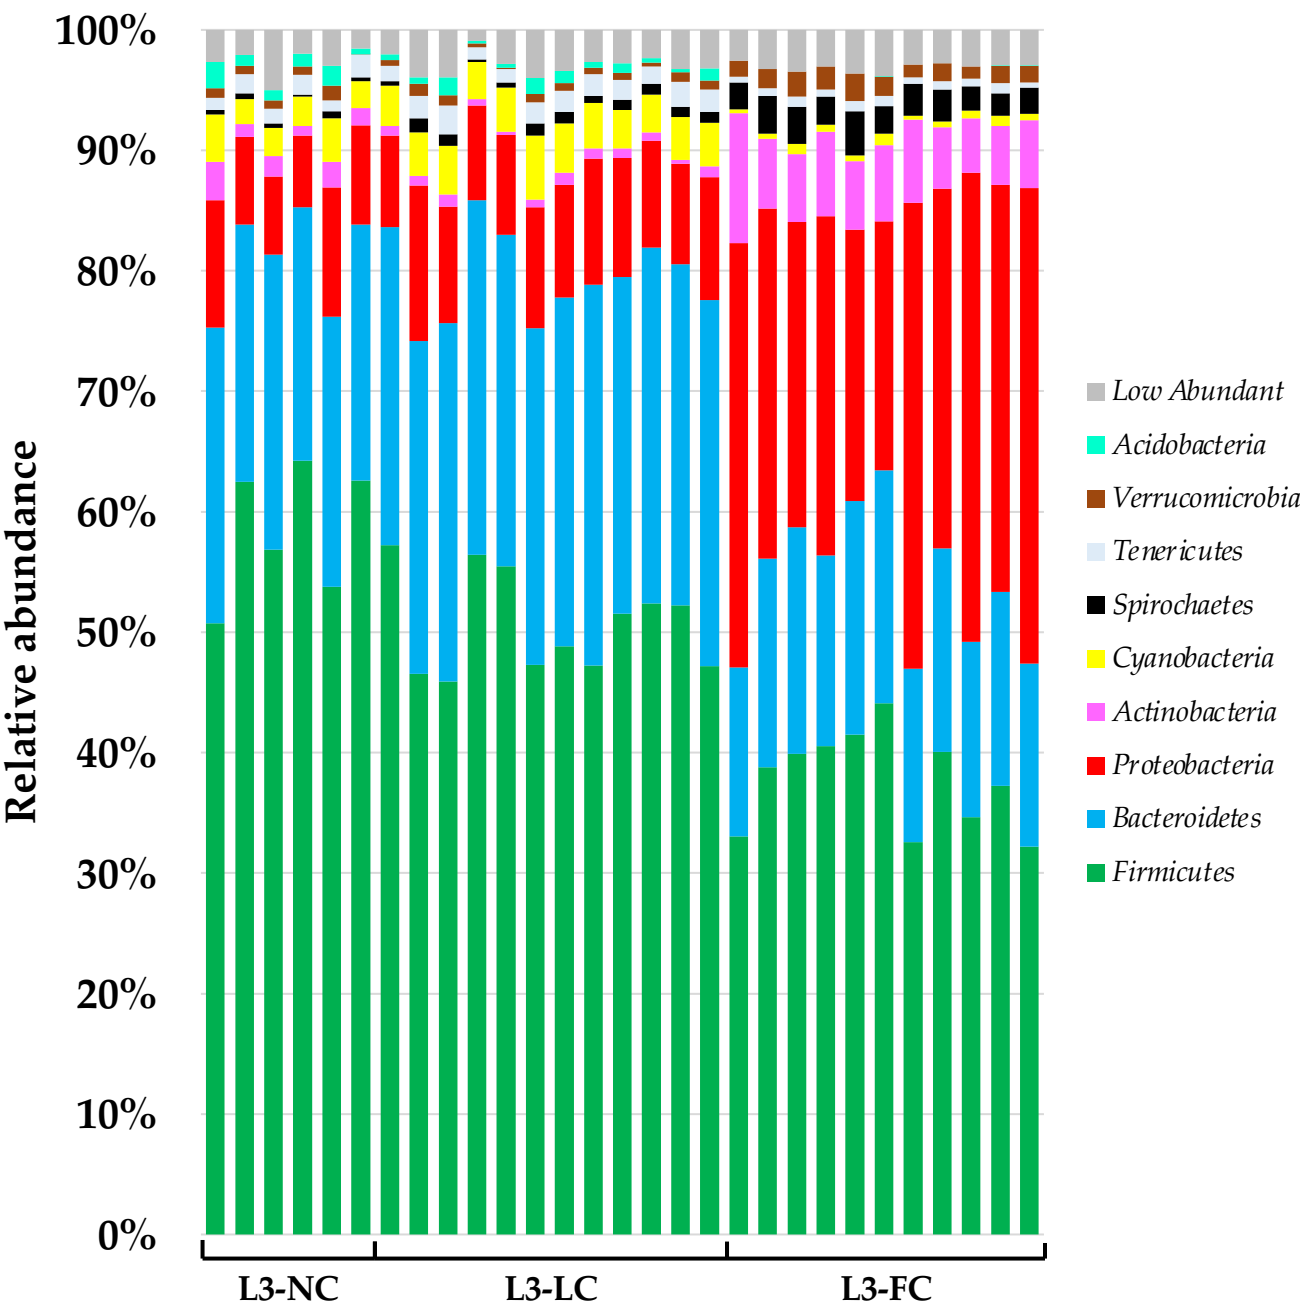

Supplement: s1 [file s1]

**B**

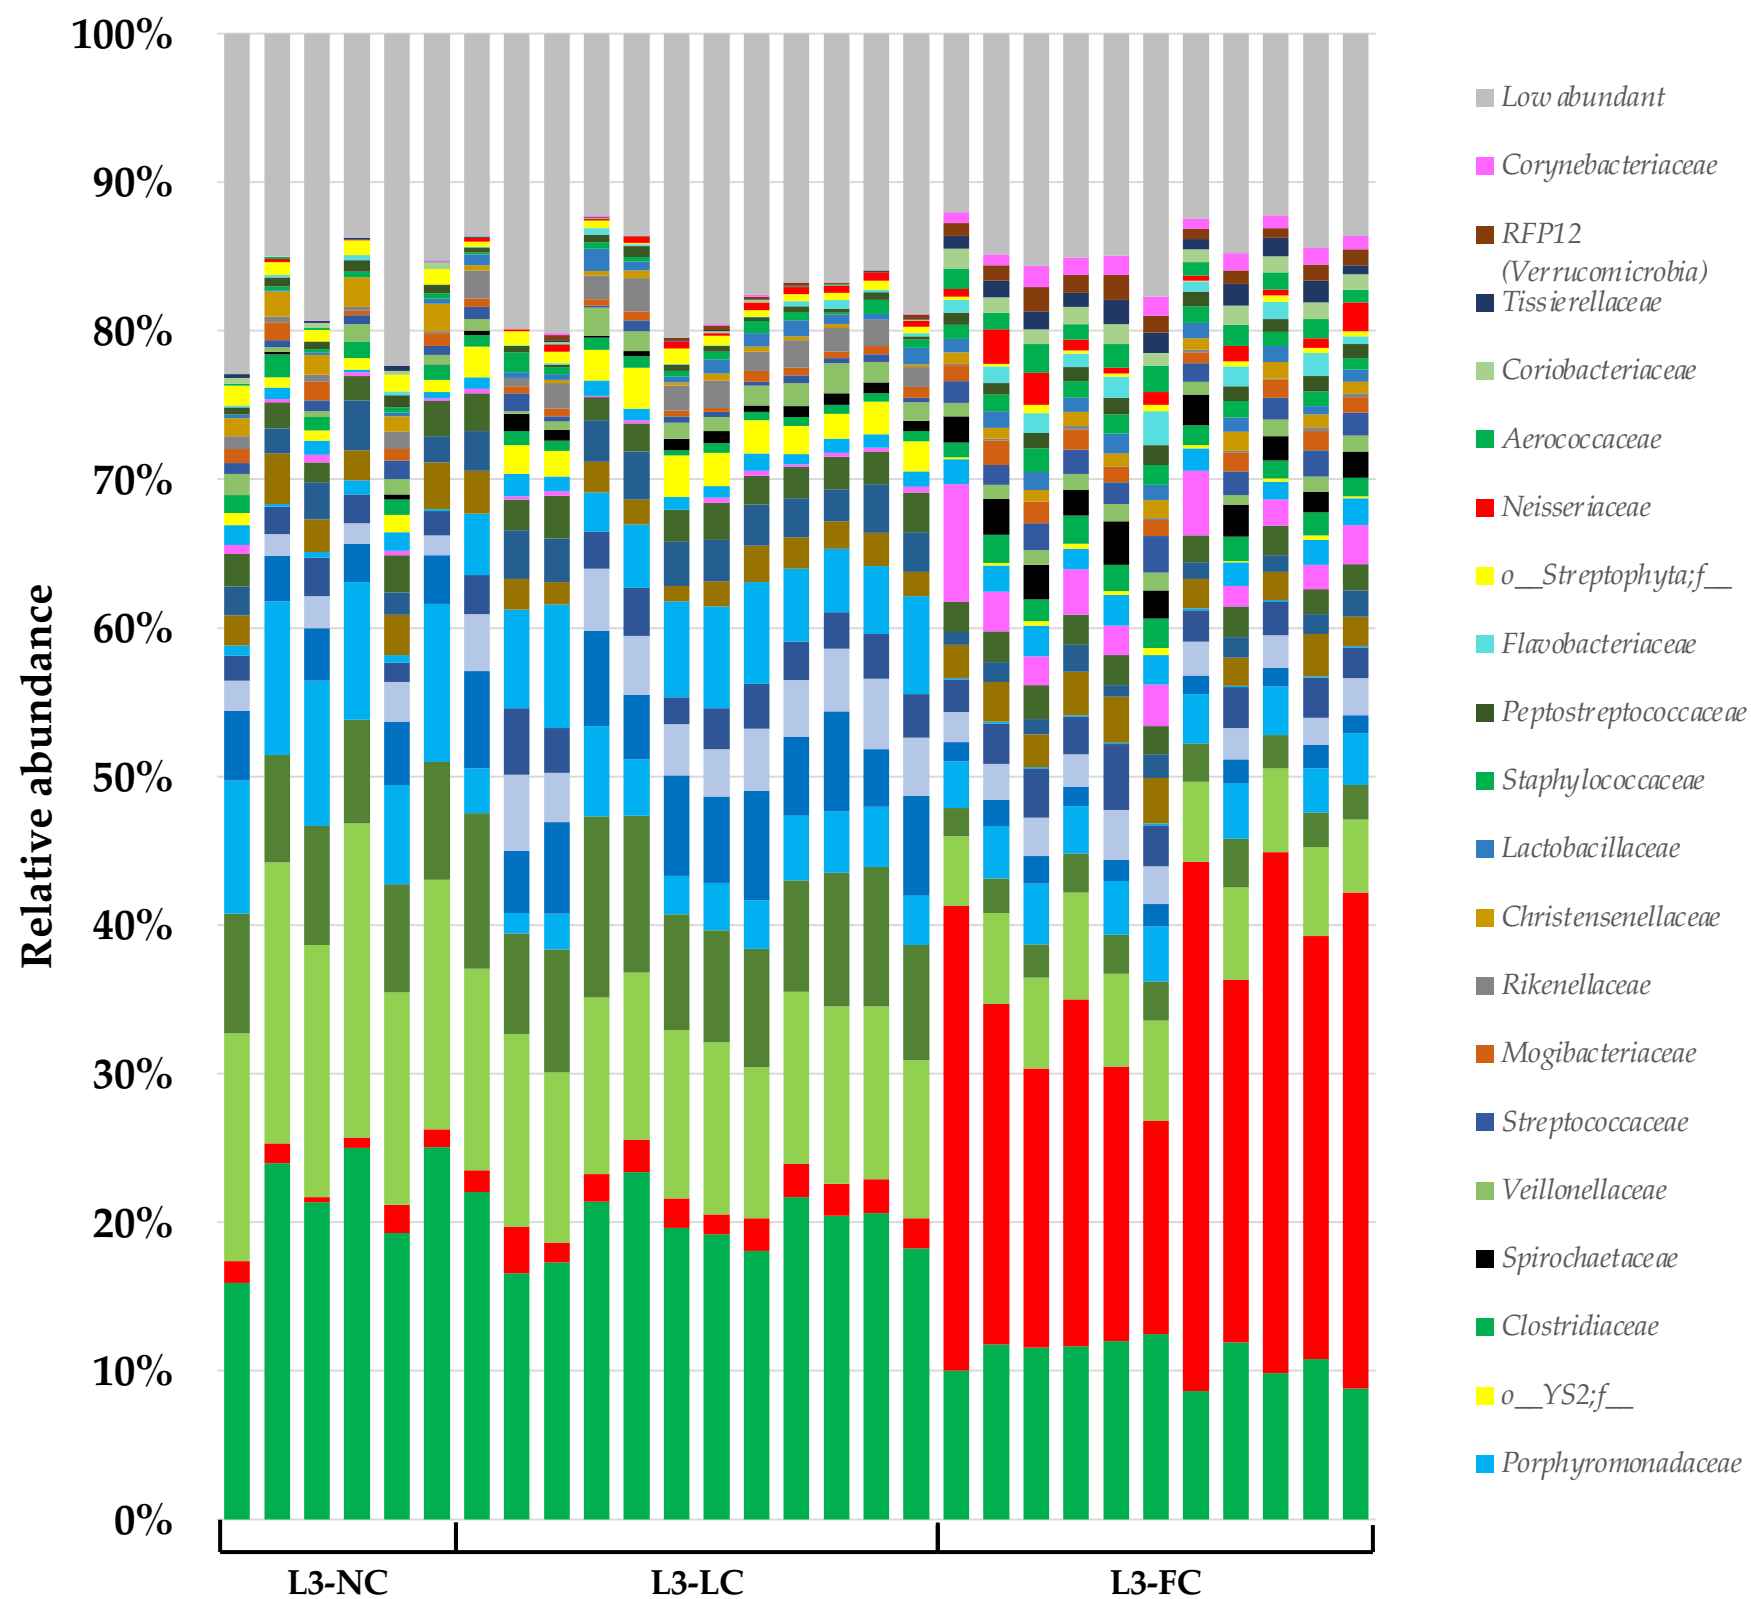

Supplement: s1 [file s1]
